# Supplementary material for: Sox2, Tlx, Gli3, and Her9 converge on Rx2 to define retinal stem cells in vivo
Source: PubMed Central journal article supplement — EMBO J. 2015 Apr 23;34(11):1572–88. doi: 10.15252/embj.201490706 (PMC4474531; doi:10.15252/embj.201490706), 2015-04-23

**Supplementary Information**

**Supplementary Tables (4)**

**Supplementary Figures (6)**

## Supplementary Tables

**Table S1**

| <b>ChIP</b>          | <b>TF</b> | <b>DNA</b>             | <b>Oligos</b> | <b>Input enrichment (%)</b> | <b>Standard deviation</b> |
|----------------------|-----------|------------------------|---------------|-----------------------------|---------------------------|
| 1 <sup>st</sup> ChIP | Sox2      | <i>Rx2</i> pCRE        | control       | 0.18940                     | 0.03781                   |
|                      | Sox2      | <i>Rx2</i> pCRE        | Sox TFBS      | 1.46008                     | 0.07868                   |
| 1 <sup>st</sup> ChIP | Sox2      | <i>Rx2</i> pCRE mtSox  | control       | 0.14629                     | 0.05193                   |
|                      | Sox2      | <i>Rx2</i> pCRE mtSox  | Sox TFBS      | 0.46493                     | 0.00684                   |
| 2 <sup>nd</sup> ChIP | Sox2      | <i>Rx2</i> pCRE        | control       | 0.24626                     | 0.05506                   |
|                      | Sox2      | <i>Rx2</i> pCRE        | Sox TFBS      | 1.27606                     | 0.08749                   |
| 2 <sup>nd</sup> ChIP | Sox2      | <i>Rx2</i> pCRE mtSox  | control       | 0.16761                     | 0.06863                   |
|                      | Sox2      | <i>Rx2</i> pCRE mtSox  | Sox TFBS      | 0.50728                     | 0.02485                   |
| 1 <sup>st</sup> ChIP | Gli3      | <i>Rx2</i> pCRE        | control       | 0.25974                     | 0.06795                   |
|                      | Gli3      | <i>Rx2</i> pCRE        | Gli TFBS      | 0.35838                     | 0.04032                   |
| 1 <sup>st</sup> ChIP | Gli3      | <i>Rx2</i> pCRE delGli | control       | 0.32085                     | 0.05322                   |
|                      | Gli3      | <i>Rx2</i> pCRE delGli | Gli TFBS      | 0.34280                     | 0.01176                   |
| 2 <sup>nd</sup> ChIP | Gli3      | <i>Rx2</i> pCRE        | control       | 0.69584                     | 0.12550                   |
|                      | Gli3      | <i>Rx2</i> pCRE        | Gli TFBS      | 0.97944                     | 0.00960                   |
| 2 <sup>nd</sup> ChIP | Gli3      | <i>Rx2</i> pCRE delGli | control       | 2.37300                     | 0.50782                   |
|                      | Gli3      | <i>Rx2</i> pCRE delGli | Gli TFBS      | 2.62135                     | 0.07708                   |



**Table S2**

| <b>ChIP</b>          | <b>TF</b> | <b>DNA</b>      | <b>Oligos</b> | <b>Input enrichment (%)</b> | <b>Standard deviation</b> |
|----------------------|-----------|-----------------|---------------|-----------------------------|---------------------------|
| 1 <sup>st</sup> ChIP | Tlx       | <i>Rx2</i> pCRE | control       | 0.12093                     | 0.00947                   |
|                      | Tlx       | <i>Rx2</i> pCRE | Tlx TFBS      | 0.21501                     | 0.03982                   |
| 2 <sup>nd</sup> ChIP | Tlx       | <i>Rx2</i> pCRE | control       | 0.08591                     | 0.06278                   |
|                      | Tlx       | <i>Rx2</i> pCRE | Tlx TFBS      | 0.27133                     | 0.02523                   |
| 1 <sup>nd</sup> ChIP | Her9      | <i>Rx2</i> pCRE | control       | 0.07458                     | 0.00875                   |
|                      | Her9      | <i>Rx2</i> pCRE | Her9 TFBS     | 0.24208                     | 0.15420                   |
| 2 <sup>nd</sup> ChIP | Her9      | <i>Rx2</i> pCRE | control       | 0.04465                     | 0.03358                   |
|                      | Her9      | <i>Rx2</i> pCRE | Her9 TFBS     | 0.10571                     | 0.03606                   |

**Table S3**

| <b>Name</b> | <b>Oligonucleotide sequence (predicted motifs are underlined)</b> |
|-------------|-------------------------------------------------------------------|
| Sox2 wt     | TATCTTTCAGACAATAGATTTGTTG                                         |
| Sox2 mt     | TATCTTTCAGACGCTAGATTTGTTG                                         |
| Gli3 wt     | TTAGCAATGGCCTCCCTCTGTGGTC                                         |
| Gli3 del    | CTTCATTAGCAATGTGGTCTGAAAG                                         |
| Her9 wt     | AGAATGGAAGCACGAGAGGAACTCC                                         |
| Her9 mt     | AGAATGGAAGGTCGGAAGGAACTCC                                         |
| Tlx 01 wt   | TGATCTCACTAAGTCATGCTGAGAT                                         |
| Tlx 01 mt   | TGATCTCACTAGATCATGCTGAGAT                                         |
| Tlx 02 wt   | TGGTAGACTTTGACTTTTTTTTGAC                                         |
| Tlx 02 mt   | TGGTAGACTTTGATCTTTTTTTTGAC                                        |

**Table S4**

| <b>Name</b>        | <b>Oligonucleotide sequence</b> |
|--------------------|---------------------------------|
| Sox TFBS fwd       | CCATCCCTGTCTTTTCTCCGT           |
| Sox TFBS rev       | TGAAGCCTCAACAAAACCTCCT          |
| Sox control fwd    | AACCAGCGCCATTCTGATCA            |
| Sox control rev    | CCAGTGTCTTACCGGTGTCC            |
| Gli TFBS fwd       | CTCTCCACACAAGCCATTATCT          |
| Gli TFBS rev       | TGCTCCAAATGTGTCCTGCT            |
| Gli control fwd    | GTTACAACCGCCAAGAAGCTG           |
| Gli control rev    | GCCCTTCTTGGCCTTAATGAG           |
| Tlx 02 TFBS fwd    | CCTGCTGAGGTCTGCTCTTC            |
| Tlx 02 TFBS rev    | TGGACTCACTTTCTGATTCTTGCA        |
| Tlx 02 control fwd | ACCGAGAAGGAGATCGTGGA            |
| Tlx 02 control rev | AACTTGCCGGTCAGTCCTTT            |
| Her TFBS fwd       | TCATCTACTGGCTTGATGAAGG          |
| Her TFBS rev       | TCTCTGACCTCACTACCCCC            |
| Her9 control fwd   | ACCGAGAAGGAGATCGTGGA            |
| Her9 control rev   | AACTTGCCGGTCAGTCCTTT            |



aGFP aRx2 aGS

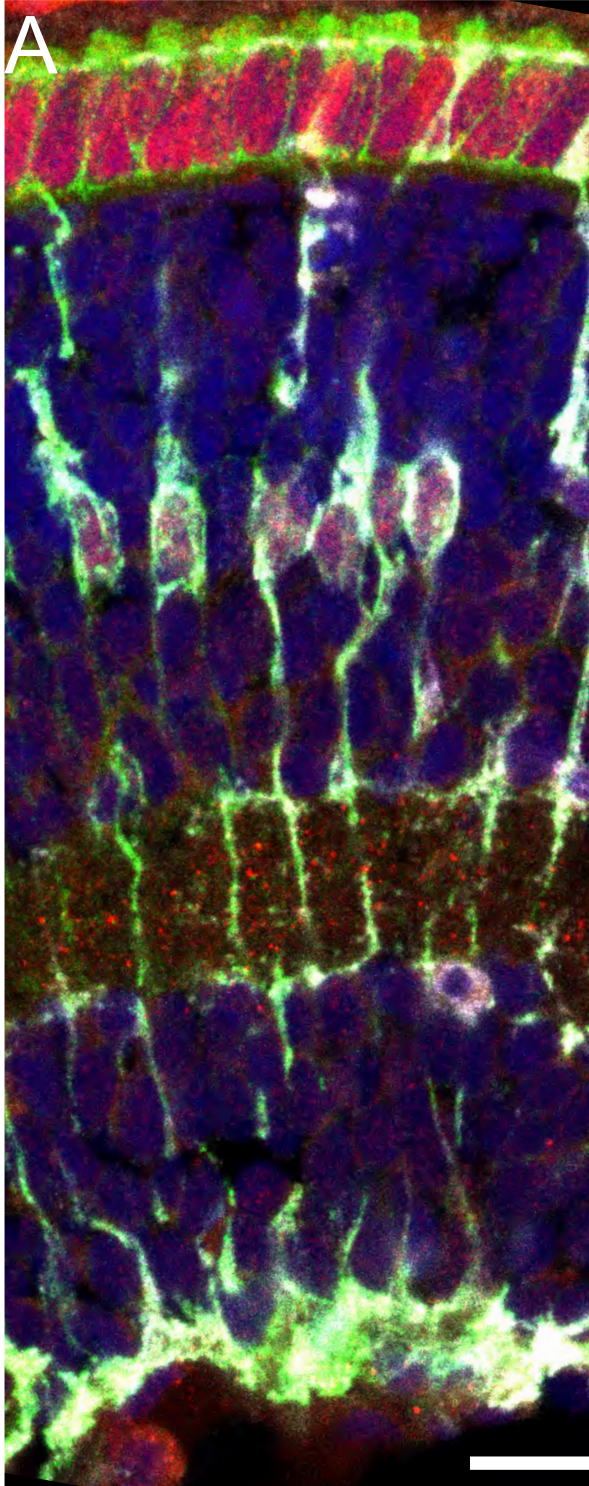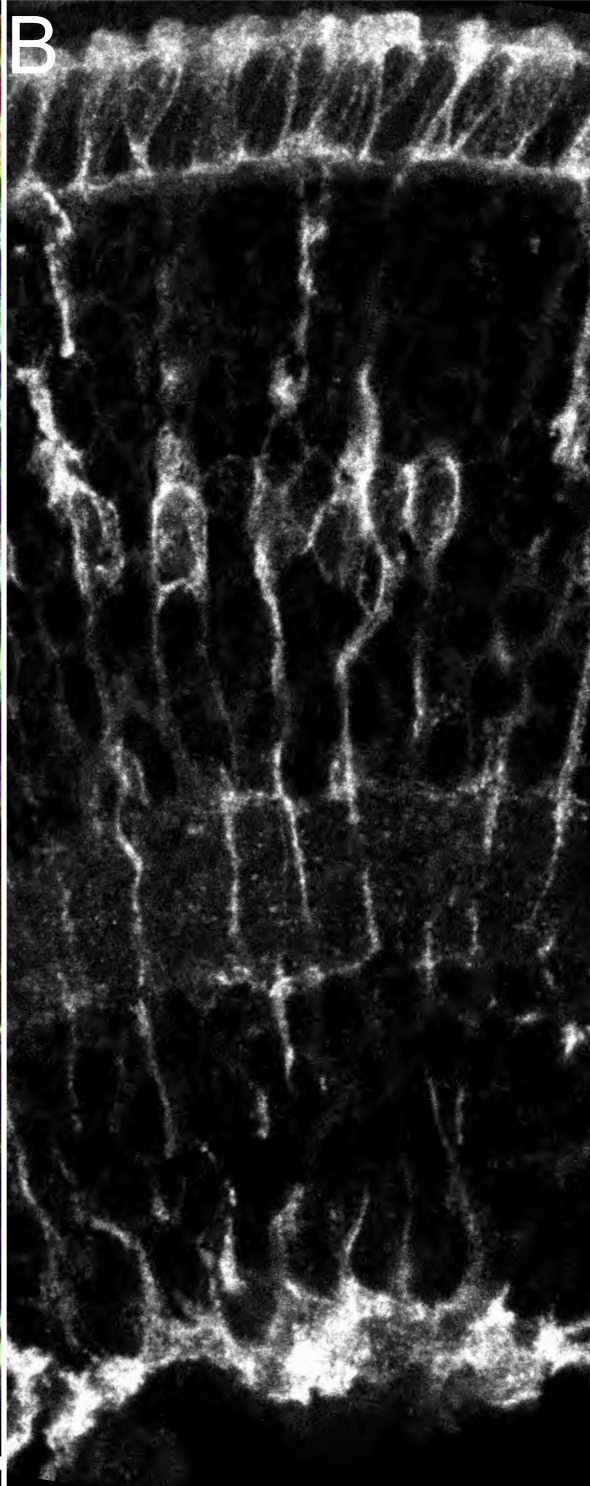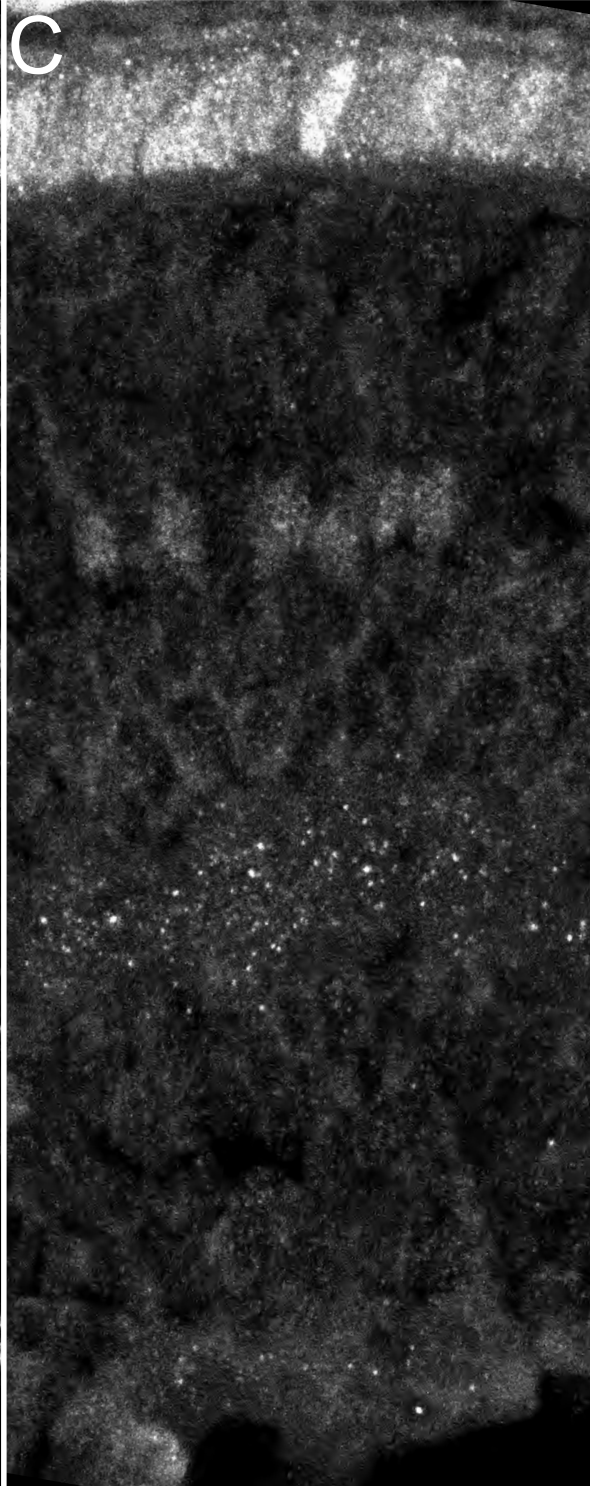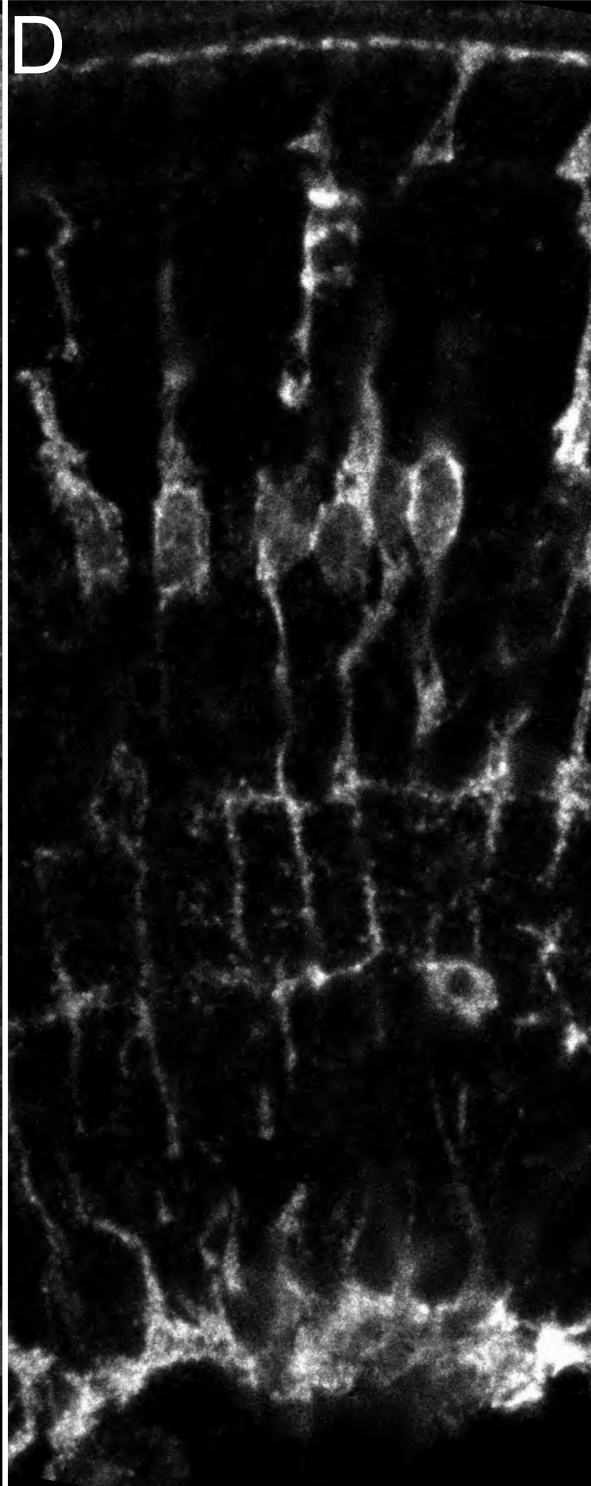

ONL

INL

IPL

GCL



# Reinhardt\_FigS2

aBrdU

aGFP DAPI

aPHH3

aGFP DAPI

aPCNA

aGFP DAPI

*Rx2::Tub-GFP*

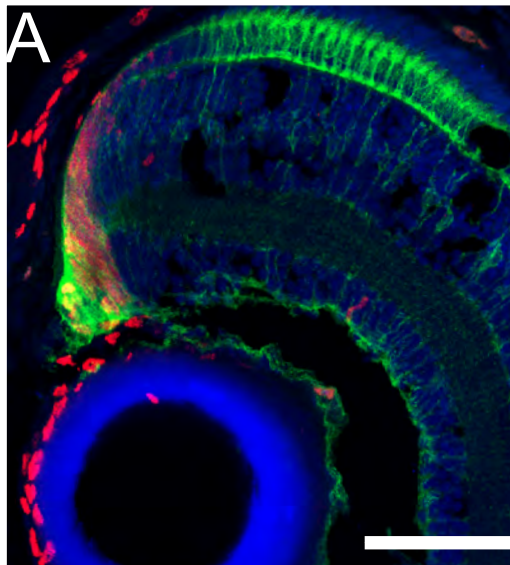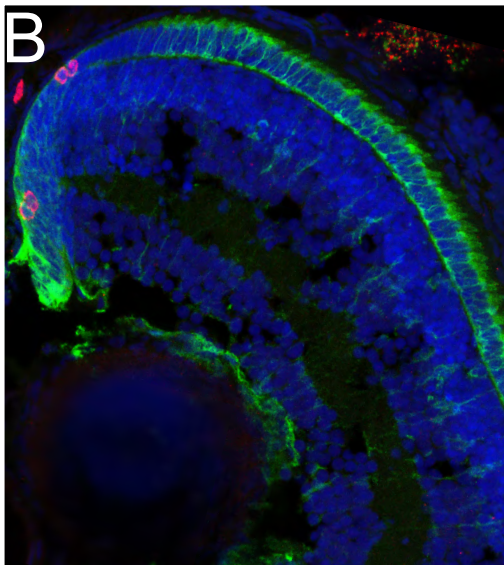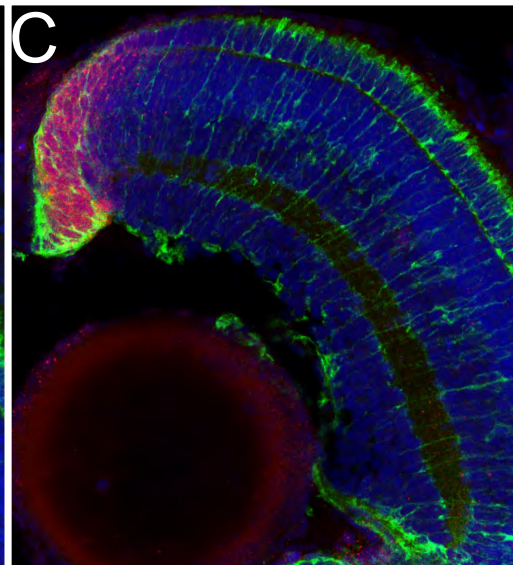



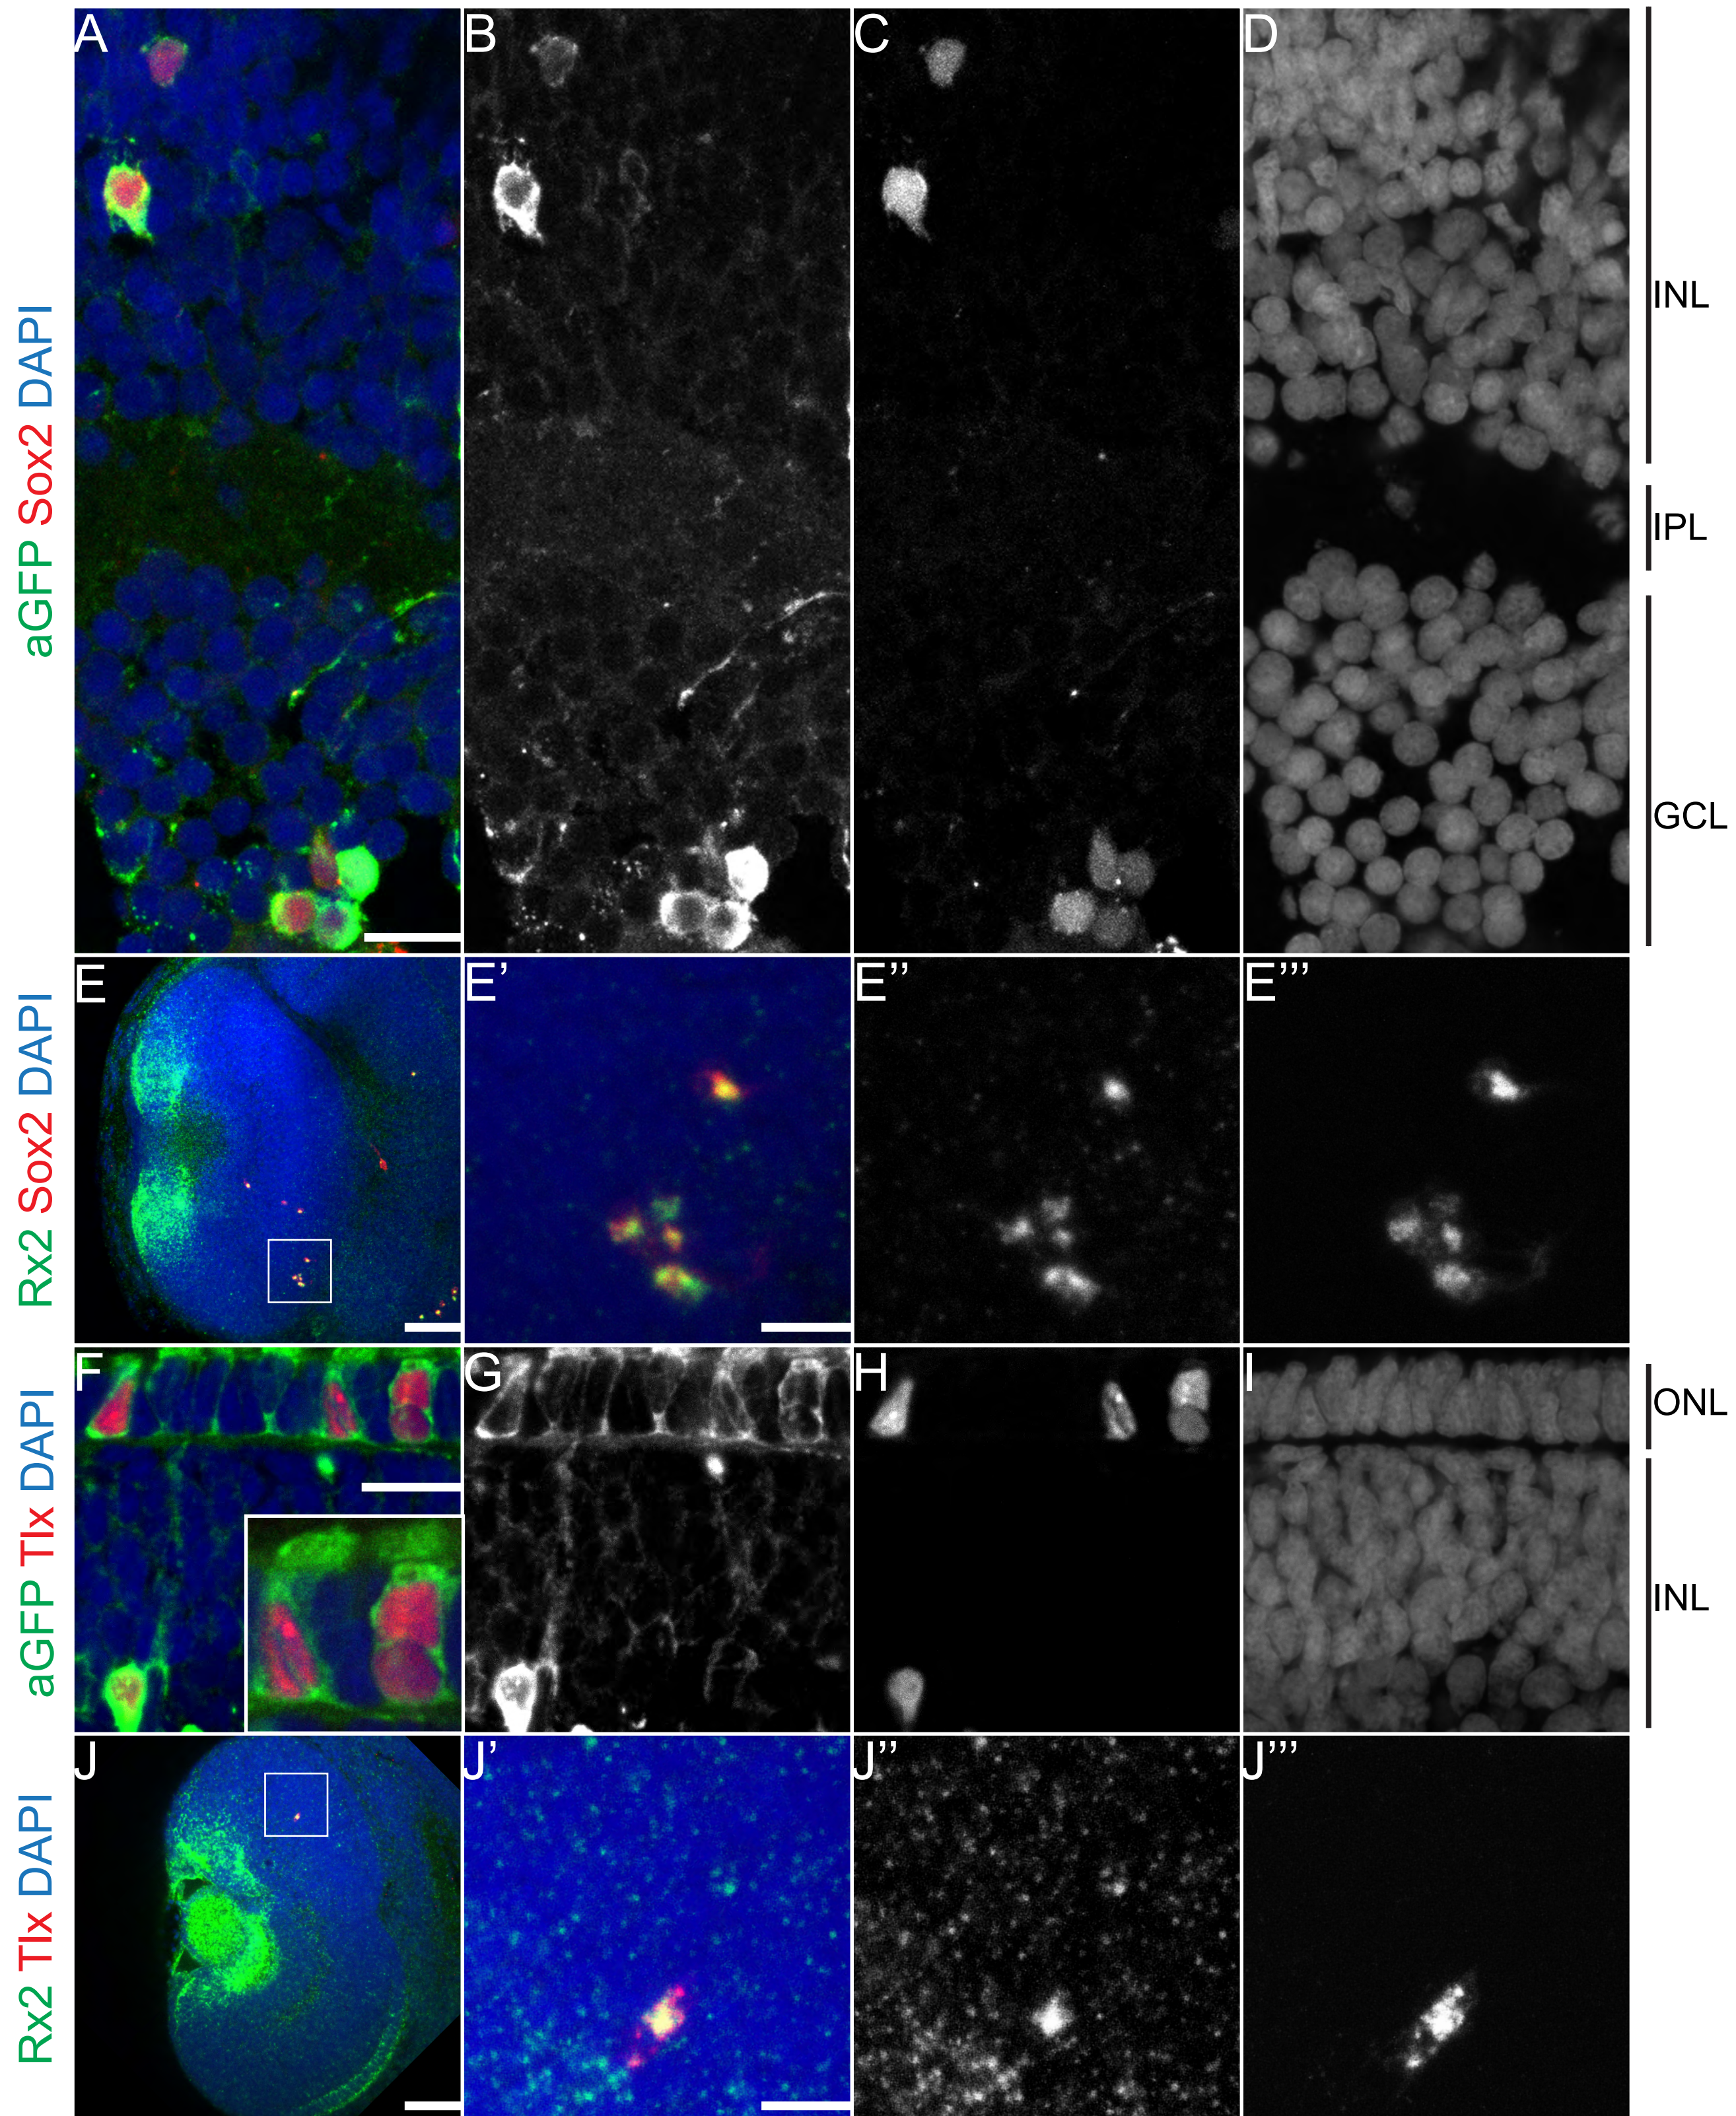



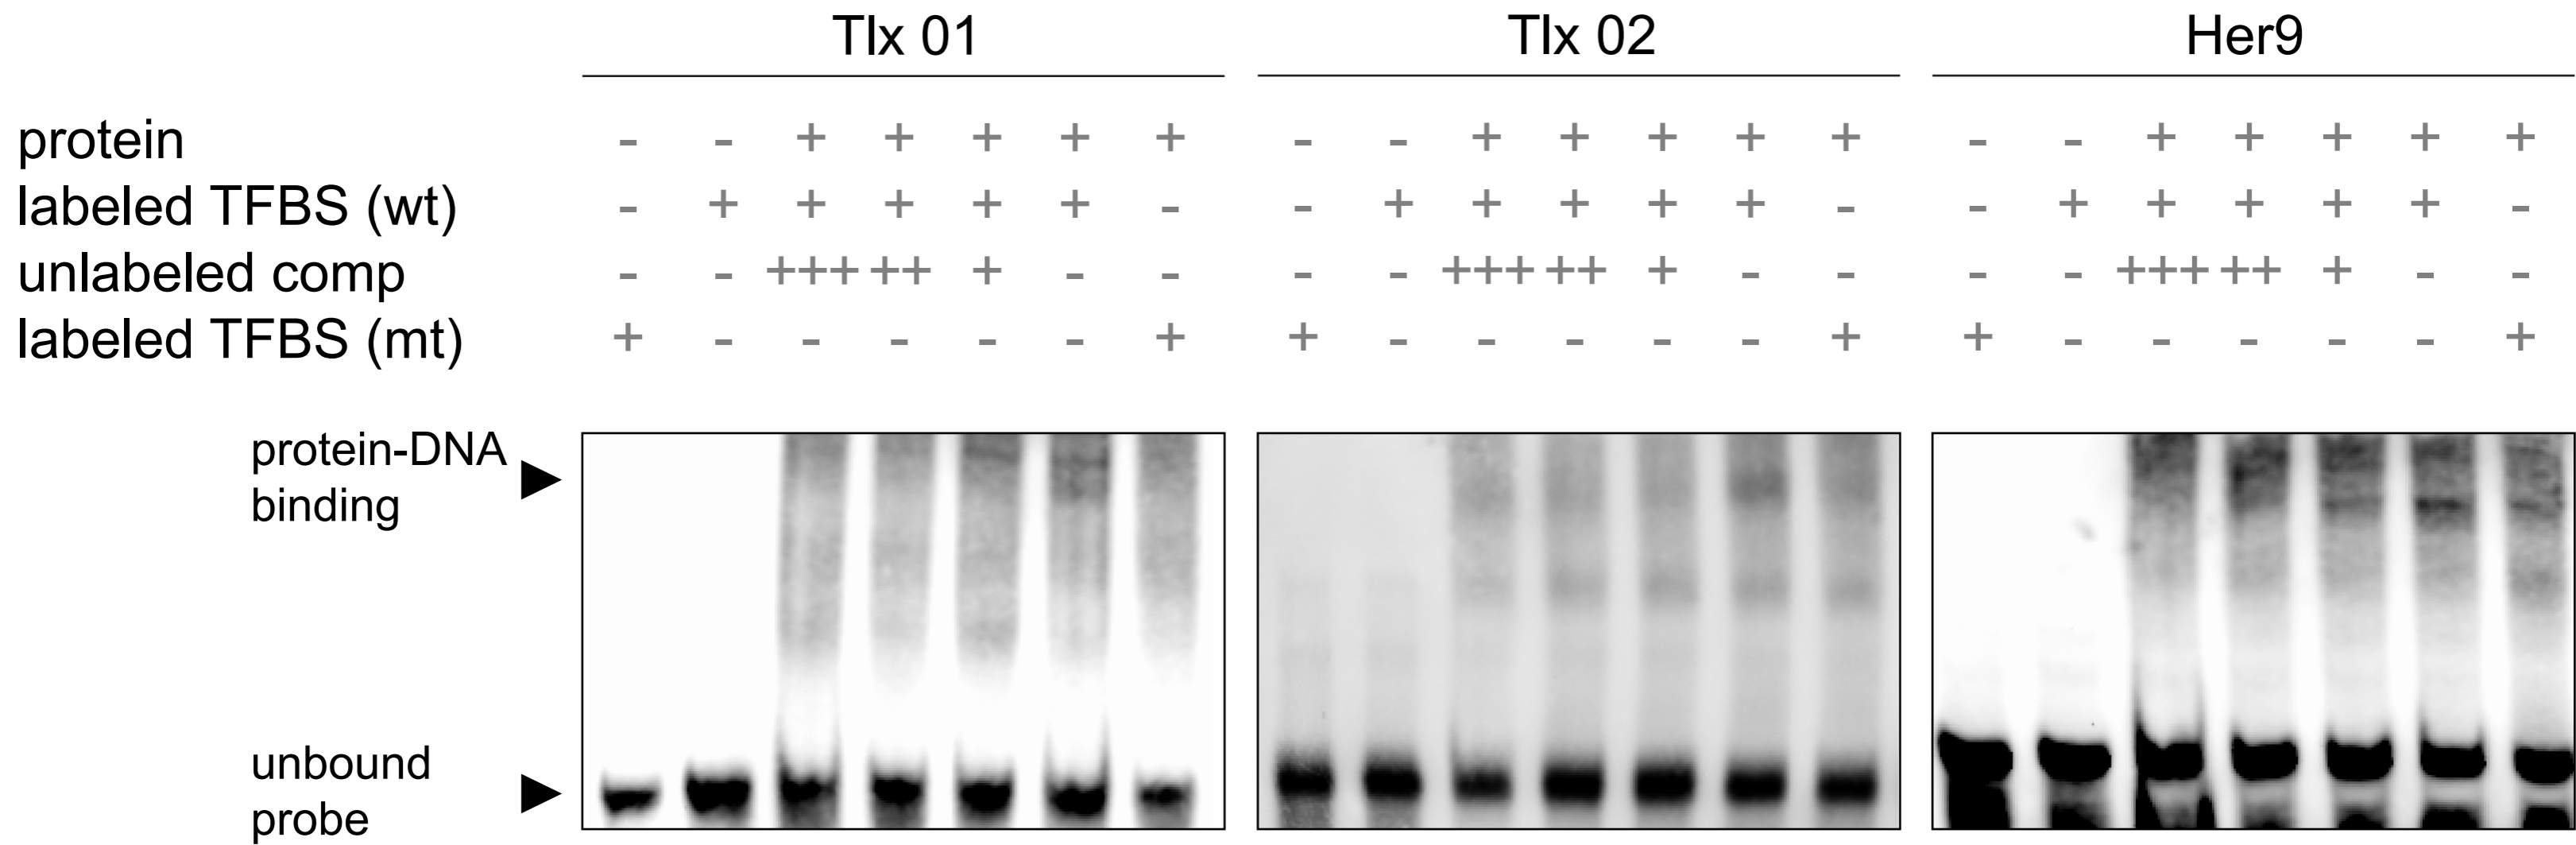

A

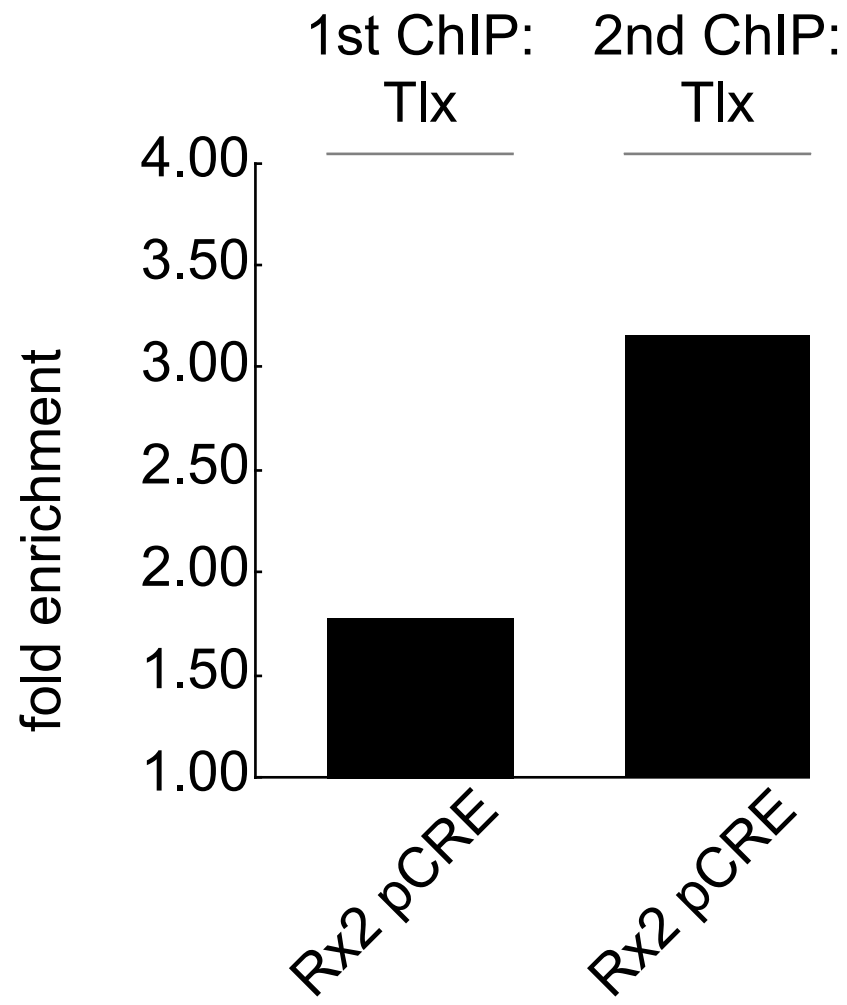

B

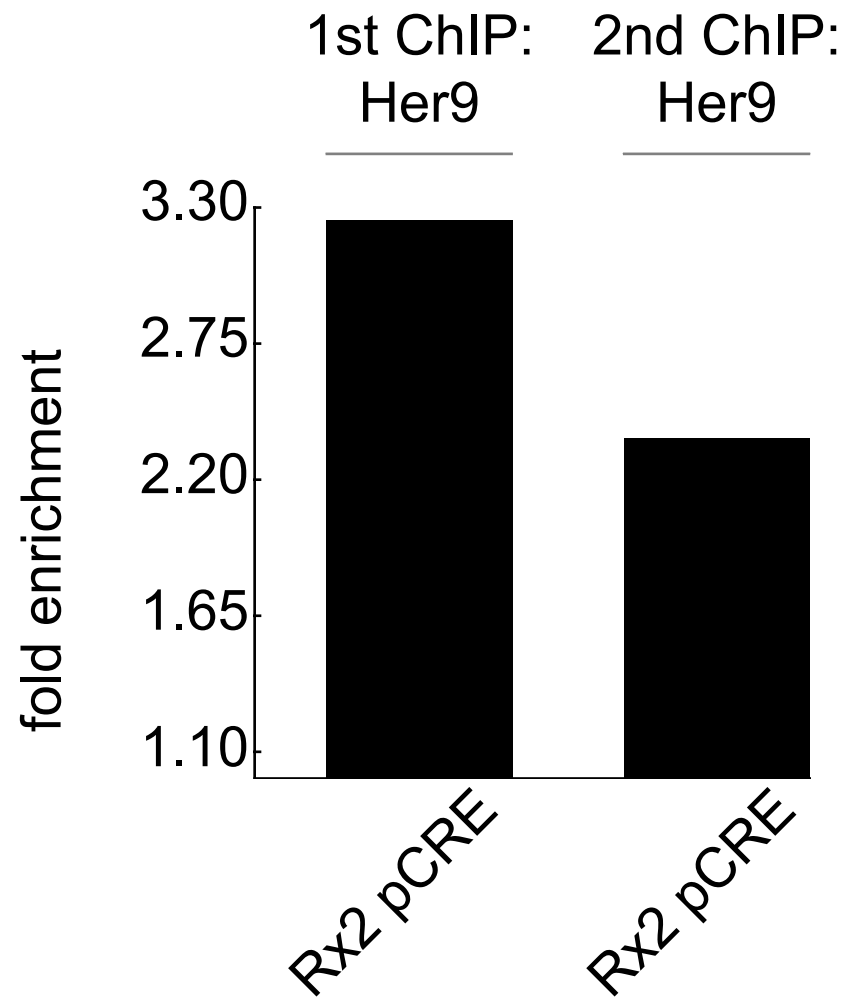



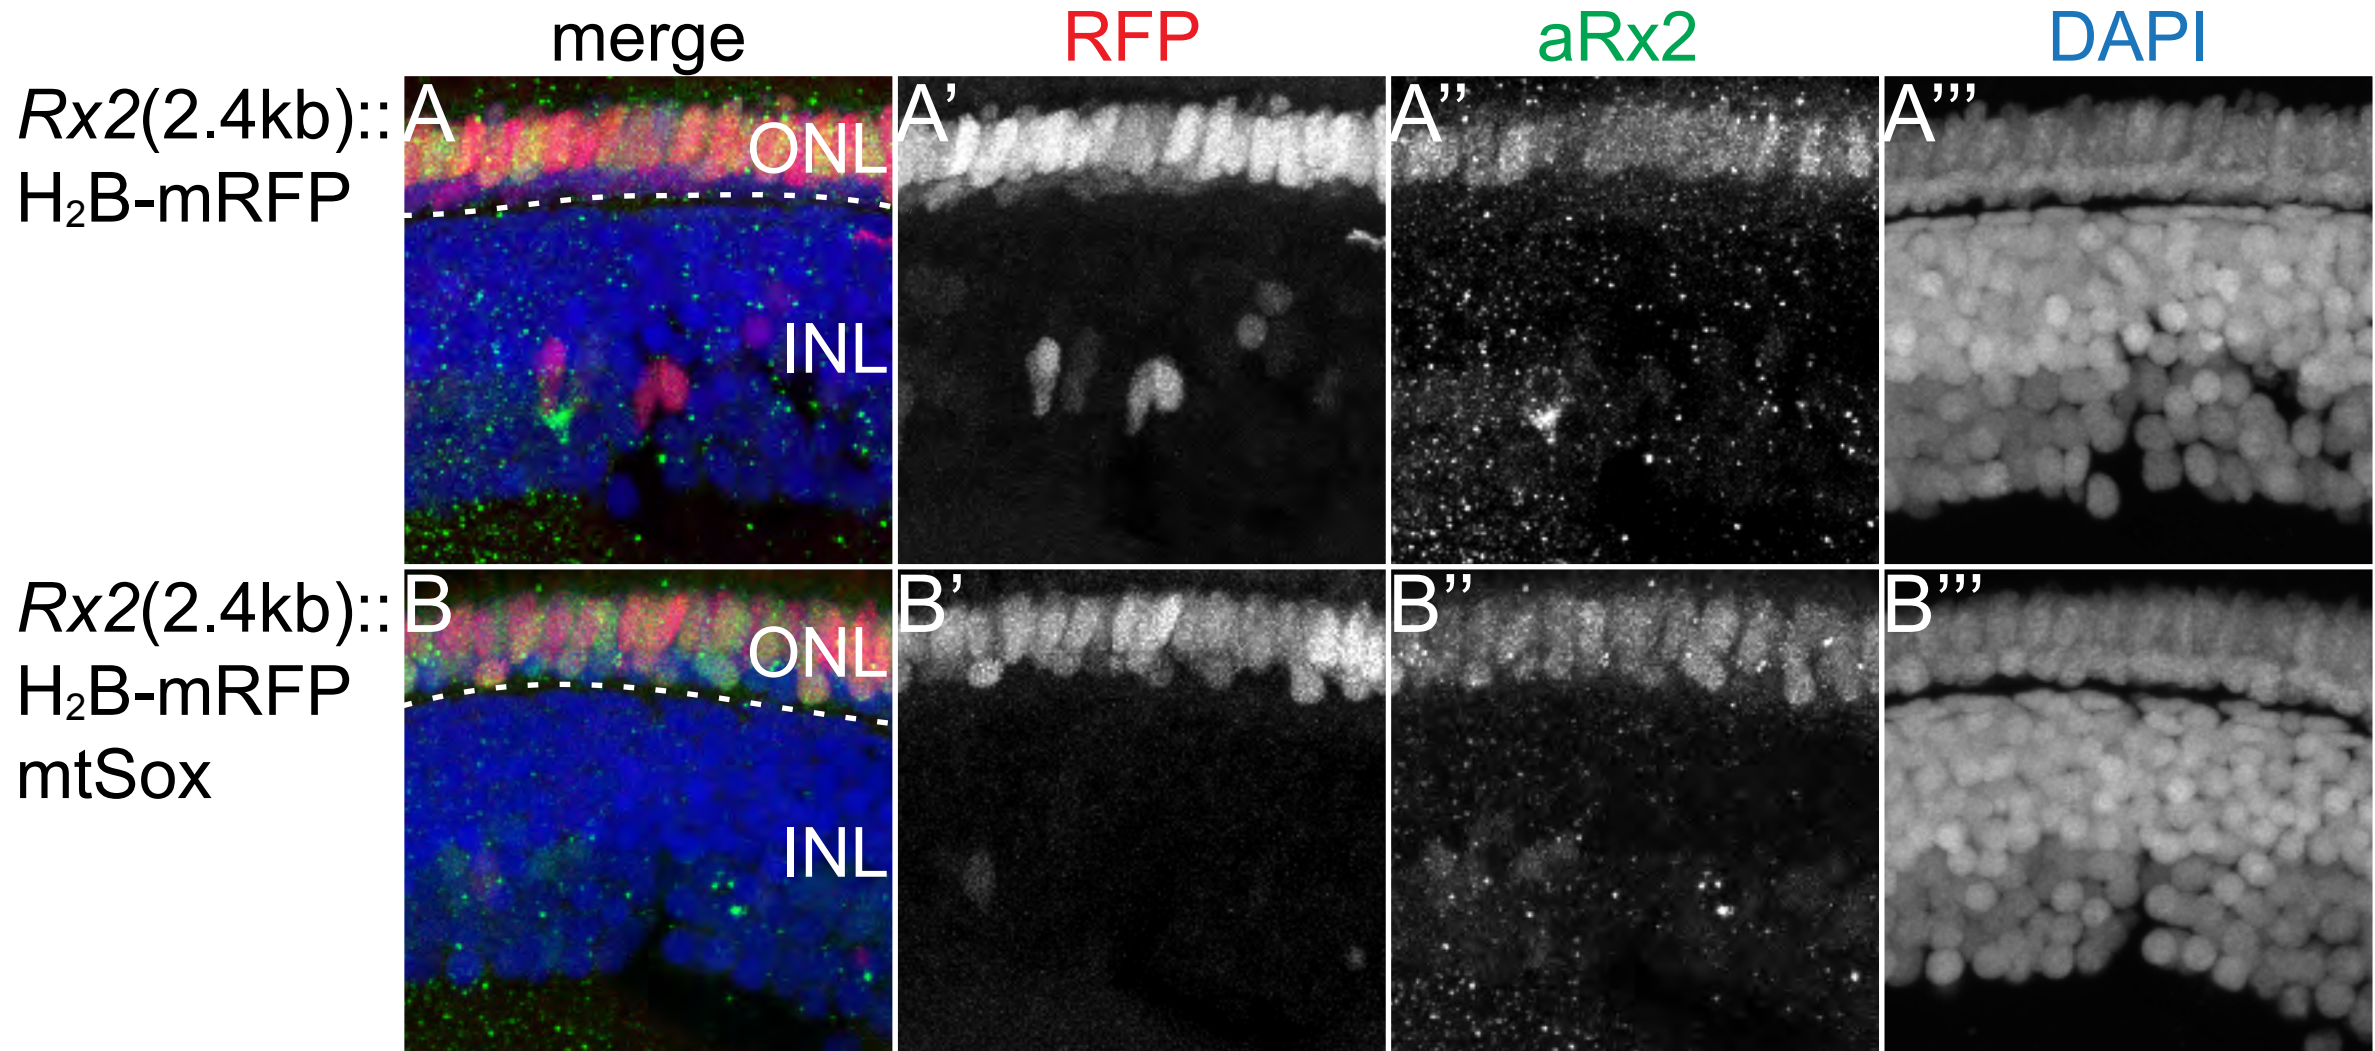

Supplement: embj0034-1572-sd1.pdf [file embj0034-1572-sd1.pdf]
